# Supplementary material for: Functional Characterization of the Ryanodine Receptor Gene in Diaphorina citri
Source: MDPI journal article supplement (doi:10.3390/life12122005), 2022-12-01
Supplement: s1 [file s1]

Table S1 The detailed information of collected samples

| Population | Sample size | Latitude   | Longitude   | Altitude |
|------------|-------------|------------|-------------|----------|
| 1          | 8           | 23°9'15''  | 113°21'13'' | 40.2m    |
| 2          | 14          | 23°40'49'' | 114°15'39'' | 72.8     |
| 3          | 18          | 23°9'14''  | 113°22'0''  | 50.5m    |

Table S2 Primers used in the experiment

| Product name | Primer sequences (5'-3')                                                  | Length (bp) | Use of primers      |
|--------------|---------------------------------------------------------------------------|-------------|---------------------|
| S1           | F: CGCGAGTTATTTCTCCCCGT<br>R: GTCTTCTATTCACCTGCAGAGC                      | 1621        | Full length cloning |
| S2           | F: GTCAGGAGAAGGATGACCAGAA<br>R: ACCATTTGCCGCTAGACACG                      | 2331        |                     |
| S3           | F: GTGAGACGGTAAGAACATTGC<br>R: CACCGGTCTTCTCTGGGAT                        | 2191        |                     |
| S4           | F: GTGAGACGGTAAGAACATTGC<br>R: CACCGGTCTTCTCTGGGAT                        | 856         |                     |
| S5           | F: ATGACGGATATTGCACCGGACAGCATTGAAAACATCCGCA<br>R: TCCCGATCCTTCTTCTTCTCTCT | 3365        | Alternative splice  |
| S6           | GGATGGAATATTGAACACAGCGAGGCAGATGTGCCT<br>AACGCTGCAAGAGTTCATAAGAC           | 3183        |                     |
| S7           | F: TGGTGATGAAAACCTCTACAGCTGGGTATTGCTGTGCTACG<br>R: CGGATTTACAGTCTCACAGTTG | 3846        |                     |
| 5'-UTR       | F: CCAGATTTCGACAGAGAACTTAG<br>R: GATAGGTCAGGAGGGATGTTCTTGTACGCAATATTCTCGA | 961         |                     |
| 3'-UTR       | F: CATCTGTGGTATAGGCAAGGAC<br>R: CGGATTTACAGTCTCACAGTTG                    | 482         |                     |
| ASI          | F: CCAGGTAGAAAATGATTCACTGAC<br>R: AGTGCCGATTACCGAAACCT                    | 292         |                     |
| ASII         | F: CCAGGTAGAAAATGATTCACTGAC<br>R: TGTGACTAACTCCTGGAGTGC                   | 399         |                     |
| ASIII        | F: CCTGACCTATCCCAATGTGTG<br>R: CATATCACTGTTCTGATGGCG                      | 168         |                     |
| ASIV         | F: CTGGACACAGAACACTTCTC<br>R: TACGGTCCACCAACACGCTTC                       | 161         |                     |
| ASV          | F: CGAGCAGAGAAGAATTATGCC<br>R: AATACTTGAGCTGGTTCACATCCT                   | 415         |                     |
| M4752        | F: CGATATATCCGGTCTAGGCAG<br>R: CGTTATTGATCGACGTGGATCG                     | 245         | Sanger sequencing   |
| G4909        | F: CGTTCTTGTACAGTCTATGGTATTTTC<br>R: TAACGTCAGTGTACAGCTGC                 | 217         |                     |

Note: F, forward primer; R, reverse primer.

Table S3 Characterization of the Ryanodine receptor gene from *Diaphorina citri*

| Sequence ID | Number of Amino Acid | Molecular Weight | Theoretical pI | Instability Index | Aliphatic Index | Grand Average of Hydropathicity |
|-------------|----------------------|------------------|----------------|-------------------|-----------------|---------------------------------|
| DcRyR       | 5130                 | 580830.34        | 5.41           | 46.18             | 84.36           | -0.335                          |

Table S4 The accession numbers of the sequences used in this study

| Name       | Accession no.  | Species                          |
|------------|----------------|----------------------------------|
| SifRyR     | XP_025425821.1 | <i>Sipha_flava</i>               |
| MsRyR      | XP_025202171.1 | <i>Melanaphis sacchari</i>       |
| HhRyR      | XP_024217614.1 | <i>Halyomorpha halys</i>         |
| ClRyR      | XP_024086009.1 | <i>Cimex lectularius</i>         |
| ApRyR      | XP_016661950.1 | <i>Acyrtosiphon pisum</i>        |
| DnRyR      | XP_015367530.1 | <i>Diuraphis noxia</i>           |
| BrmRyR     | XP_001900491.1 | <i>Brugia malayi</i>             |
| AaRyR      | XP_001657320.2 | <i>Aedes aegypti</i>             |
| MmRyR1     | NP_033135.2    | <i>Mus musculus</i>              |
| MmRyR2     | NP_076357.2    | <i>Mus musculus</i>              |
| MmRyR3     | NP_808320.2    | <i>Mus musculus</i>              |
| DrRyR1b    | NP_001096041.1 | <i>Danio rerio</i>               |
| OcRyR1     | NP_001095188.1 | <i>Oryctolagus cuniculus</i>     |
| OcRyR2     | NP_001076226.1 | <i>Oryctolagus cuniculus</i>     |
| OcRyR3     | NP_001076231.1 | <i>Oryctolagus cuniculus</i>     |
| HsRyR1     | NP_000531.2    | <i>Homo sapiens</i>              |
| HsRyR2     | NP_001026.2    | <i>Homo sapiens</i>              |
| HsRyR3     | NP_001027.3    | <i>Homo sapiens</i>              |
| LhRyR      | JAQ15715.1     | <i>Lygus hesperus</i>            |
| BmRyR      | XP_012544769   | <i>Bombyx mori</i>               |
| SrRyR1     | CEF62113.1     | <i>Strongyloides ratti</i>       |
| TtRyR      | CDW52896.1     | <i>Trichuris trichiura</i>       |
| DmRyR      | BAA41470.1     | <i>Drosophila melanogaster</i>   |
| CeRyR      | BAA08309.1     | <i>Caenorhabditis elegans</i>    |
| LcRyRbeta  | BAA04647.2     | <i>Lithobates catesbeianus</i>   |
| LcRyRalpha | BAA04646.1     | <i>Lithobates catesbeianus</i>   |
| AcRyR      | AKM95171.1     | <i>Aphis citricidus</i>          |
| DicRyR     | AKM95170.1     | <i>Dialeurodes citri</i>         |
| MpRyR      | AJA41114.1     | <i>Myzus persicae</i>            |
| TcRyR      | AIU40166.1     | <i>Tribolium castaneum</i>       |
| GmRyR      | AIP90097.1     | <i>Grapholitha molesta</i>       |
| LsRyR      | AIA23858.1     | <i>Laodelphax striatellus</i>    |
| NIrRyR     | AIA23857.1     | <i>Nilaparvata lugens</i>        |
| CsRyR      | AIA23856.1     | <i>Chilo suppressalis</i>        |
| HaRyR      | AIA23855.1     | <i>Helicoverpa armigera</i>      |
| BdRyR      | AHY02115.1     | <i>Bactrocera dorsalis</i>       |
| LdRyR      | AHW99830.1     | <i>Leptinotarsa decemlineata</i> |
| SfRyR      | AHW99829.1     | <i>Sogatella furcifera</i>       |
| CasRyR     | AHN16453.1     | <i>Carposina sasakii</i>         |
| PrRyR      | AGI62938.1     | <i>Pieris rapae</i>              |
| OfRyR      | AGH68757.1     | <i>Ostrinia furnacalis</i>       |

---

|        |                |                                 |
|--------|----------------|---------------------------------|
| BtRyR  | AFK84957.1     | <i>Bemisia tabaci</i>           |
| CmRyR  | AFI80904.1     | <i>Cnaphalocrocis medinalis</i> |
| SeRyR  | AFC36359.1     | <i>Spodoptera exigua</i>        |
| PxRyR  | AET09964.1     | <i>Plutella xylostella</i>      |
| AmRyR  | XP_006569098.1 | <i>Apis mellifera</i>           |
| BotRyR | XP_048270099.1 | <i>Bombus terrestris</i>        |
| SiRyR  | XP_039305071.1 | <i>Solenopsis invicta</i>       |
| PdRyR  | XP_015173032.1 | <i>Polistes dominula</i>        |
| FaRyR  | XP_011300758.1 | <i>Fopius arisanus</i>          |
| AeRyR  | XP_011054963.1 | <i>Acromyrmex echinator</i>     |
| TpRyR  | XP_023317849.1 | <i>Trichogramma pretiosum</i>   |
| HyhRyR | QEE14187.1     | <i>Hypothenemus hampei</i>      |
| PpRyR  | XP_031356017.1 | <i>Photinus pyralis</i>         |
| SoRyR  | XP_030749978.1 | <i>Sitophilus oryzae</i>        |
| AgRyR  | XP_018566920.1 | <i>Anoplophora glabripennis</i> |

---

Table S5 Sequence identity (I) and similarity (S) between *Diaphorina citri* and other species ryanodine receptor

| I<br>S  | DcRyR        | BtRyR        | NlRyR        | AeRyR        | DmRyR        | CeRyR        | TcRyR        | BmRyR        | PxRyR        | DrRyR1b      | OcRyR1       | OcRyR2       | OcRyR3       | MmRyR1       | MmRyR2       | MmRyR3       | HsRyR1       | HsRyR2       | HsRyR3       |
|---------|--------------|--------------|--------------|--------------|--------------|--------------|--------------|--------------|--------------|--------------|--------------|--------------|--------------|--------------|--------------|--------------|--------------|--------------|--------------|
| DcRyR   |              | <b>83.59</b> | <b>83.26</b> | <b>77.38</b> | <b>76.57</b> | <b>44.97</b> | <b>80.97</b> | <b>79.63</b> | <b>78.34</b> | <b>42.86</b> | <b>43.25</b> | <b>45.62</b> | <b>43.81</b> | <b>43.45</b> | <b>45.51</b> | <b>43.65</b> | <b>43.14</b> | <b>45.60</b> | <b>43.94</b> |
| BtRyR   | <b>93.69</b> |              | 83.35        | 76.95        | 75.76        | 45.03        | 80.60        | 78.96        | 77.76        | 42.63        | 43.20        | 45.71        | 43.74        | 43.37        | 45.59        | 43.78        | 43.08        | 45.73        | 43.94        |
| NlRyR   | <b>92.73</b> | 93.41        |              | 78.15        | 76.62        | 44.61        | 80.99        | 79.38        | 78.40        | 42.80        | 43.01        | 45.30        | 43.57        | 43.10        | 45.23        | 43.47        | 42.75        | 45.32        | 43.70        |
| AeRyR   | <b>90.03</b> | 89.74        | 89.85        |              | 80.86        | 44.31        | 78.27        | 78.11        | 76.87        | 42.77        | 43.12        | 45.38        | 43.74        | 43.36        | 45.35        | 43.63        | 43.03        | 45.40        | 43.91        |
| DmRyR   | <b>89.74</b> | 89.04        | 89.03        | 92.32        |              | 44.33        | 77.54        | 77.66        | 76.40        | 41.70        | 42.50        | 44.43        | 42.94        | 42.64        | 44.40        | 42.80        | 42.38        | 44.39        | 43.03        |
| CeRyR   | <b>73.47</b> | 73.25        | 72.86        | 72.87        | 72.48        |              | 45.69        | 45.16        | 44.56        | 36.83        | 37.66        | 39.64        | 37.88        | 37.71        | 39.59        | 37.89        | 37.53        | 39.75        | 38.23        |
| TcRyR   | <b>92.28</b> | 91.86        | 91.51        | 90.61        | 90.21        | 74.11        |              | 81.56        | 79.96        | 42.74        | 43.096       | 45.33        | 44.06        | 43.30        | 45.17        | 43.82        | 42.87        | 45.33        | 44.05        |
| BmRyR   | <b>91.19</b> | 90.81        | 90.09        | 90.01        | 89.71        | 73.81        | 91.64        |              | 89.96        | 43.04        | 43.554       | 45.55        | 43.99        | 43.71        | 45.46        | 43.79        | 43.43        | 45.57        | 44.10        |
| PxRyR   | <b>90.08</b> | 89.93        | 89.45        | 89.19        | 88.83        | 72.93        | 90.51        | 95.35        |              | 42.19        | 42.906       | 44.99        | 43.29        | 42.98        | 44.90        | 42.94        | 42.82        | 45.01        | 43.28        |
| DrRyR1b | <b>70.83</b> | 71.02        | 70.92        | 71.00        | 70.54        | 66.60        | 70.95        | 71.23        | 70.3         |              | 75.443       | 64.51        | 64.32        | 75.19        | 64.29        | 64.13        | 74.98        | 64.51        | 64.77        |
| OcRyR1  | <b>70.67</b> | 70.79        | 70.63        | 70.95        | 70.42        | 66.52        | 71.15        | 70.98        | 70           | 88.69        |              | 64.40        | 64.18        | 95.86        | 64.22        | 63.90        | 96.29        | 64.46        | 64.39        |
| OcRyR2  | <b>72.40</b> | 72.75        | 72.04        | 72.23        | 71.88        | 68.71        | 72.69        | 72.76        | 72.19        | 85.76        | 85.06        |              | 67.12        | 64.37        | 97.062       | 66.95        | 64.15        | 98.67        | 67.41        |
| OcRyR3  | <b>70.94</b> | 70.90        | 70.47        | 70.54        | 70.29        | 67.45        | 71.37        | 71.11        | 70.51        | 84.49        | 84.34        | 86.81        |              | 64.19        | 66.91        | 94.74        | 63.93        | 67.08        | 96.35        |
| MmRyR1  | <b>70.70</b> | 70.81        | 70.49        | 70.84        | 70.46        | 66.52        | 70.95        | 70.86        | 69.91        | 88.87        | 98.47        | 85.37        | 84.42        |              | 64.18        | 63.96        | 95.38        | 64.43        | 64.42        |
| MmRyR2  | <b>72.55</b> | 72.72        | 72.06        | 72.28        | 71.85        | 68.73        | 72.77        | 72.63        | 72.06        | 85.60        | 84.98        | 99.20        | 86.73        | 85.19        |              | 66.90        | 64.01        | 97.20        | 67.31        |
| MmRyR3  | <b>70.52</b> | 70.67        | 70.33        | 70.43        | 70.07        | 67.29        | 71.22        | 70.96        | 70.09        | 84.55        | 84.13        | 86.68        | 97.97        | 84.14        | 86.58        |              | 63.75        | 66.97        | 95.56        |
| HsRyR1  | <b>70.89</b> | 70.80        | 70.62        | 71.09        | 70.53        | 66.55        | 71.06        | 71.13        | 70.03        | 88.94        | 98.53        | 85.13        | 84.16        | 98.42        | 84.99        | 83.98        |              | 64.19        | 64.18        |
| HsRyR2  | <b>72.51</b> | 72.85        | 72.14        | 72.39        | 71.94        | 68.73        | 72.86        | 72.89        | 72.36        | 85.76        | 85.16        | 99.72        | 86.87        | 85.41        | 99.32        | 86.74        | 85.21        |              | 67.35        |
| HsRyR3  | <b>70.93</b> | 70.99        | 70.45        | 70.71        | 70.31        | 67.69        | 71.48        | 71.26        | 70.40        | 84.77        | 84.59        | 86.99        | 98.71        | 84.56        | 86.97        | 98.53        | 84.36        | 87.07        |              |

The percentage of similarity (lower left triangle) and identity (upper right triangle) are illustrated. Abbreviations and GenBank entries for the RyR isoforms are described in Table S4.
