# Supplementary figures and images for: Functional Characterization of the Ryanodine Receptor Gene in Diaphorina citri
Source: MDPI journal article supplement (doi:10.3390/life12122005), 2022-12-01

Figure S1

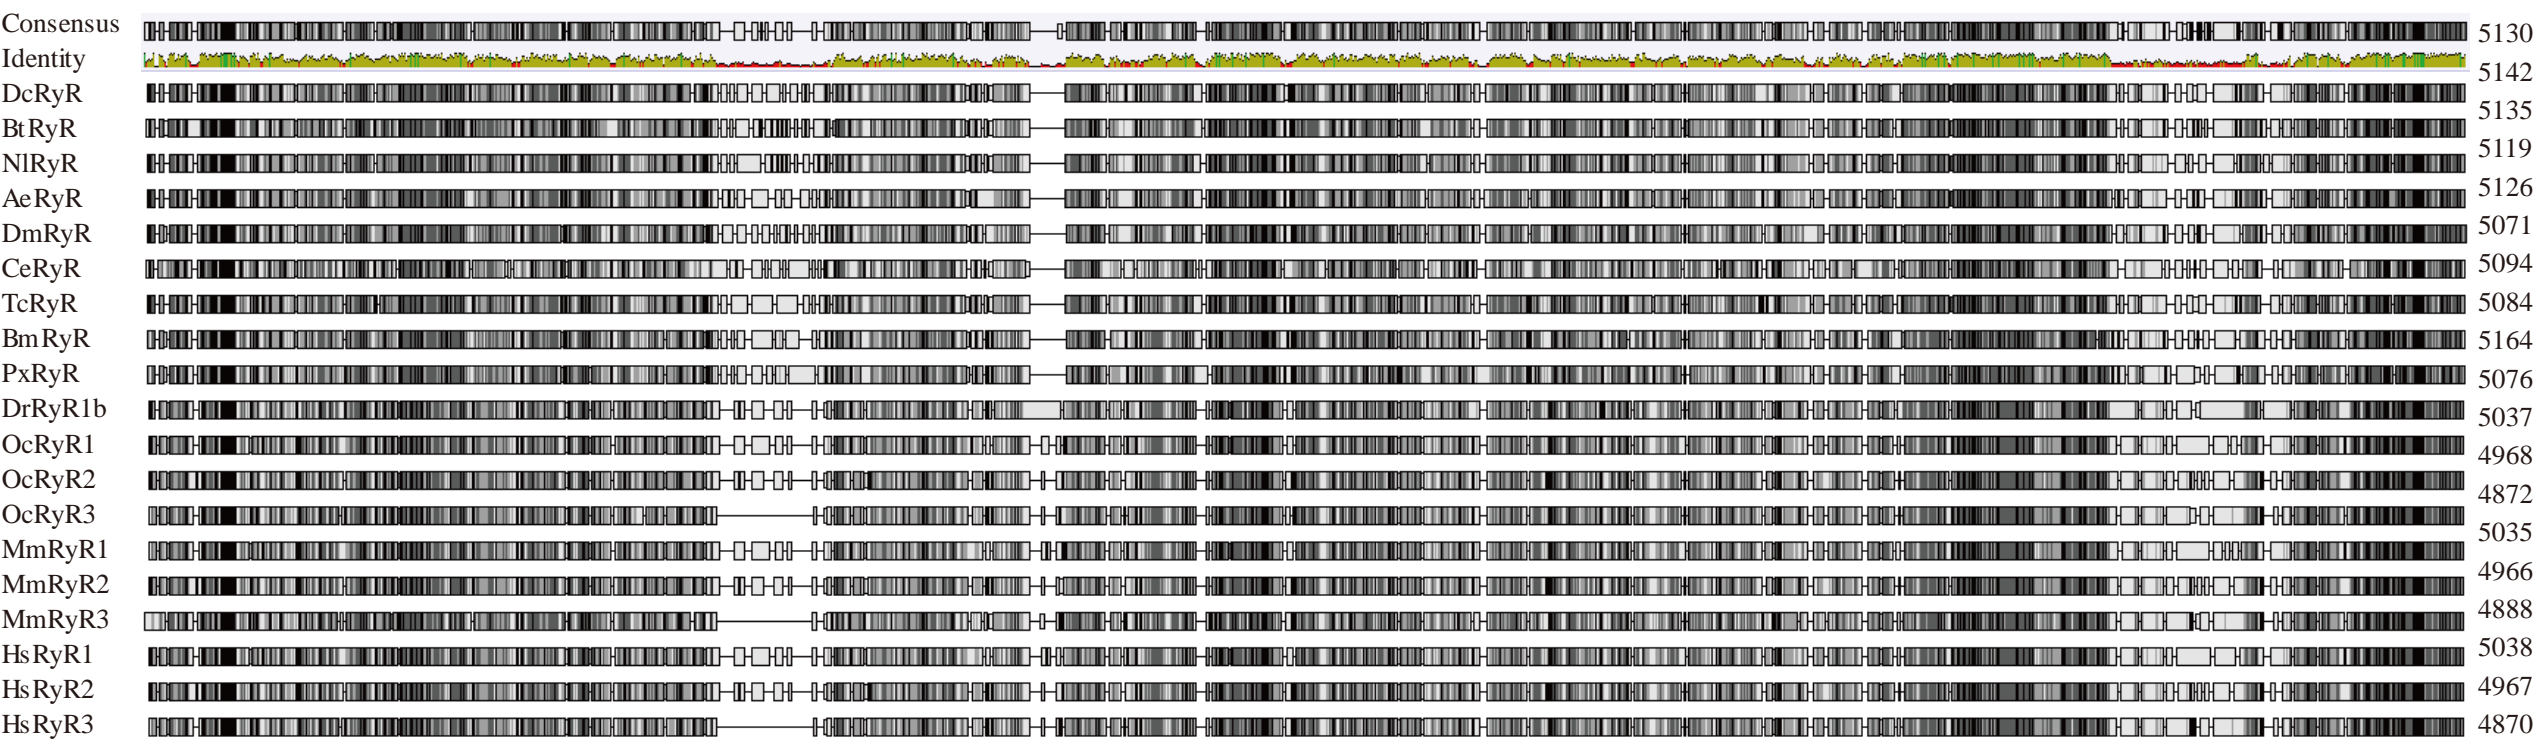



Figure S2

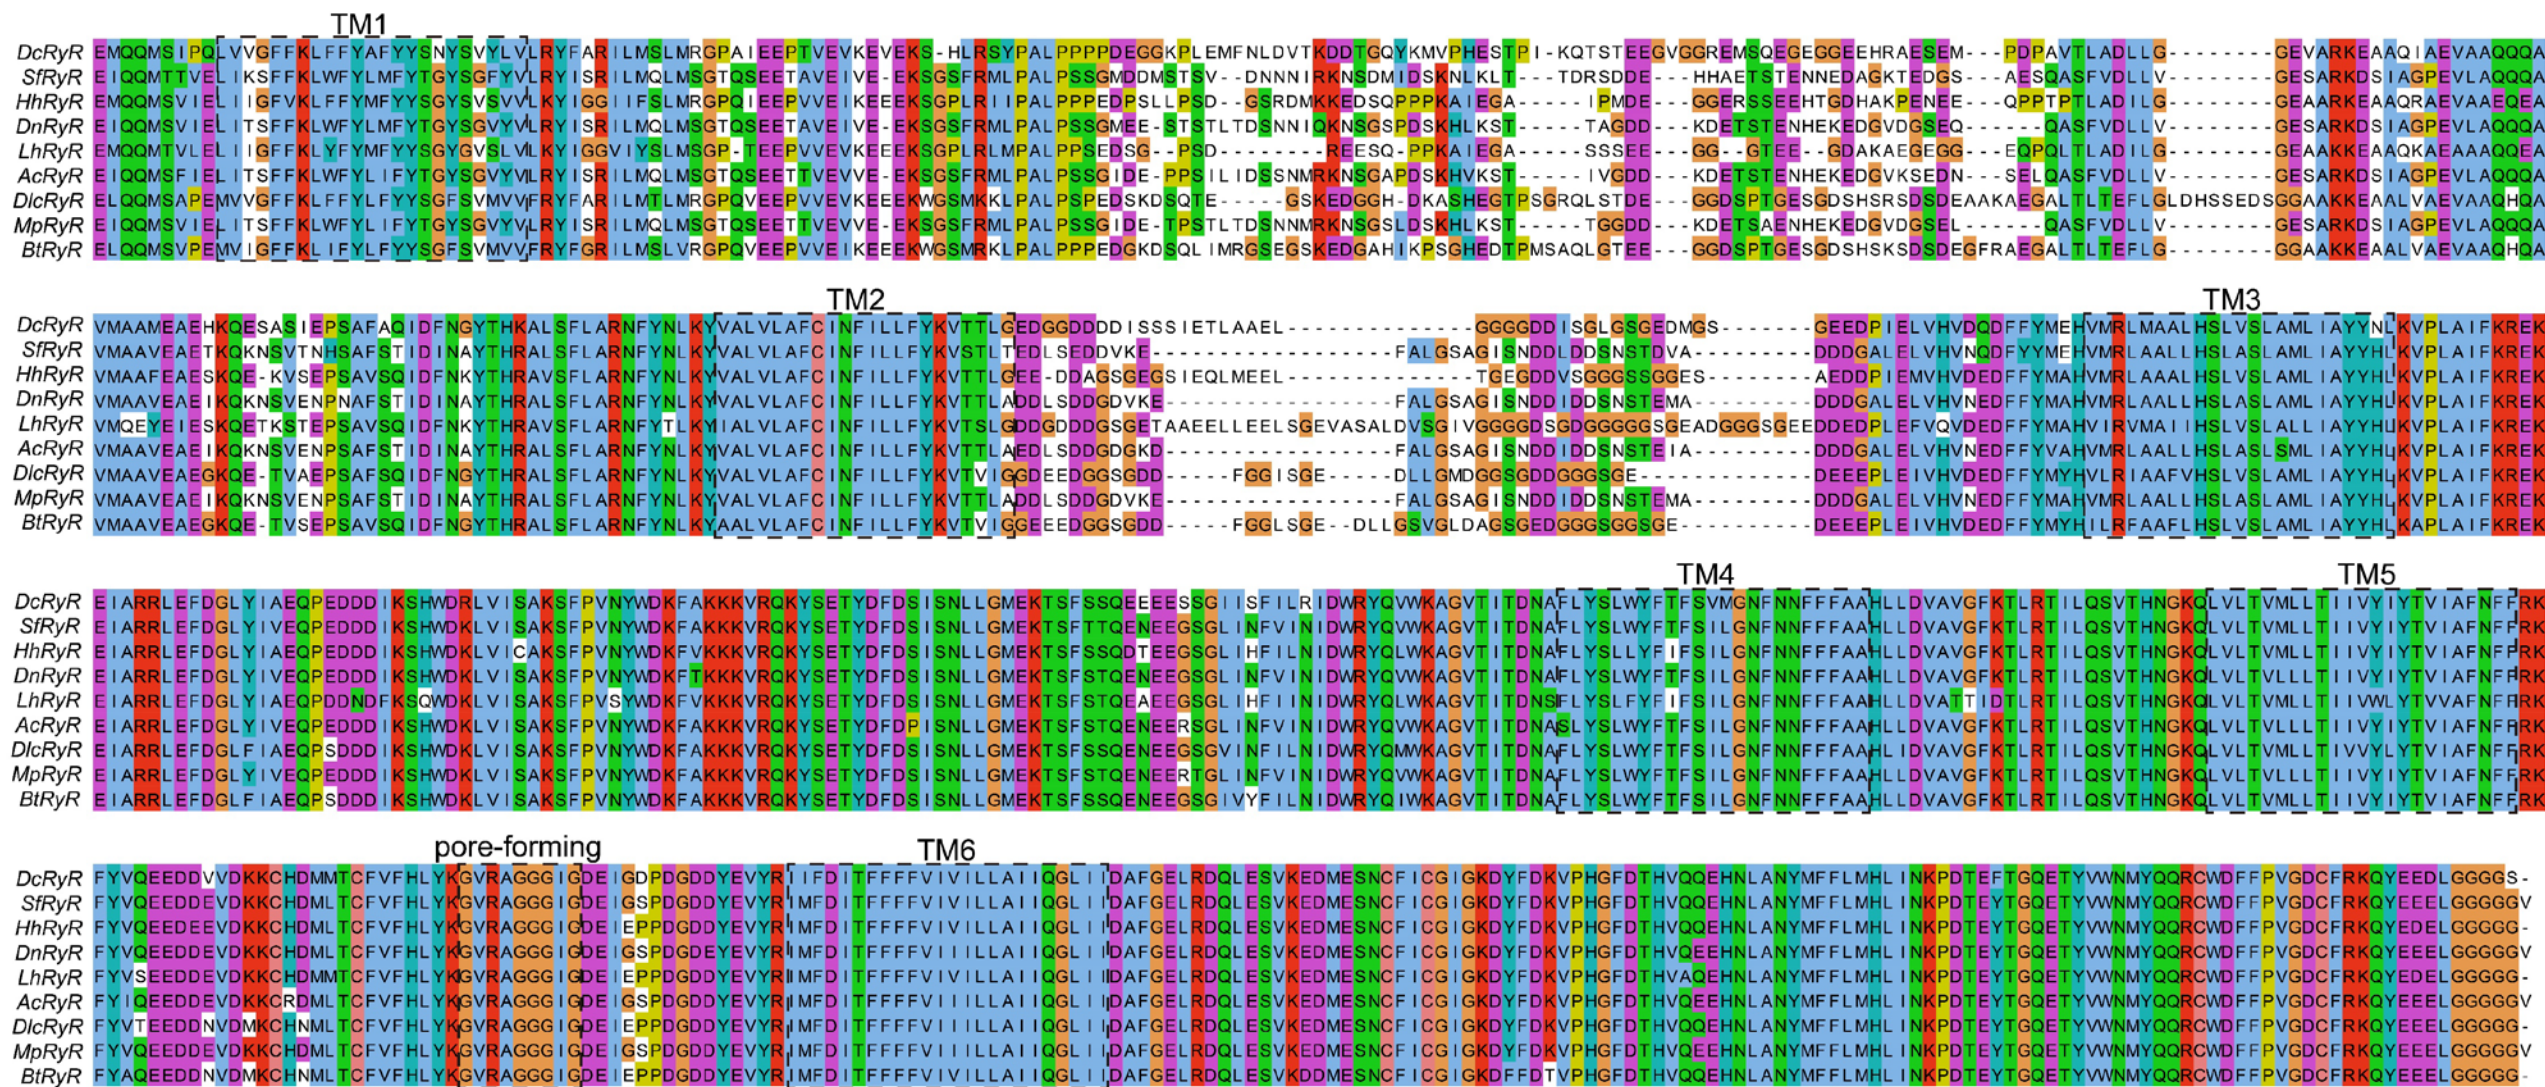

Figure S3

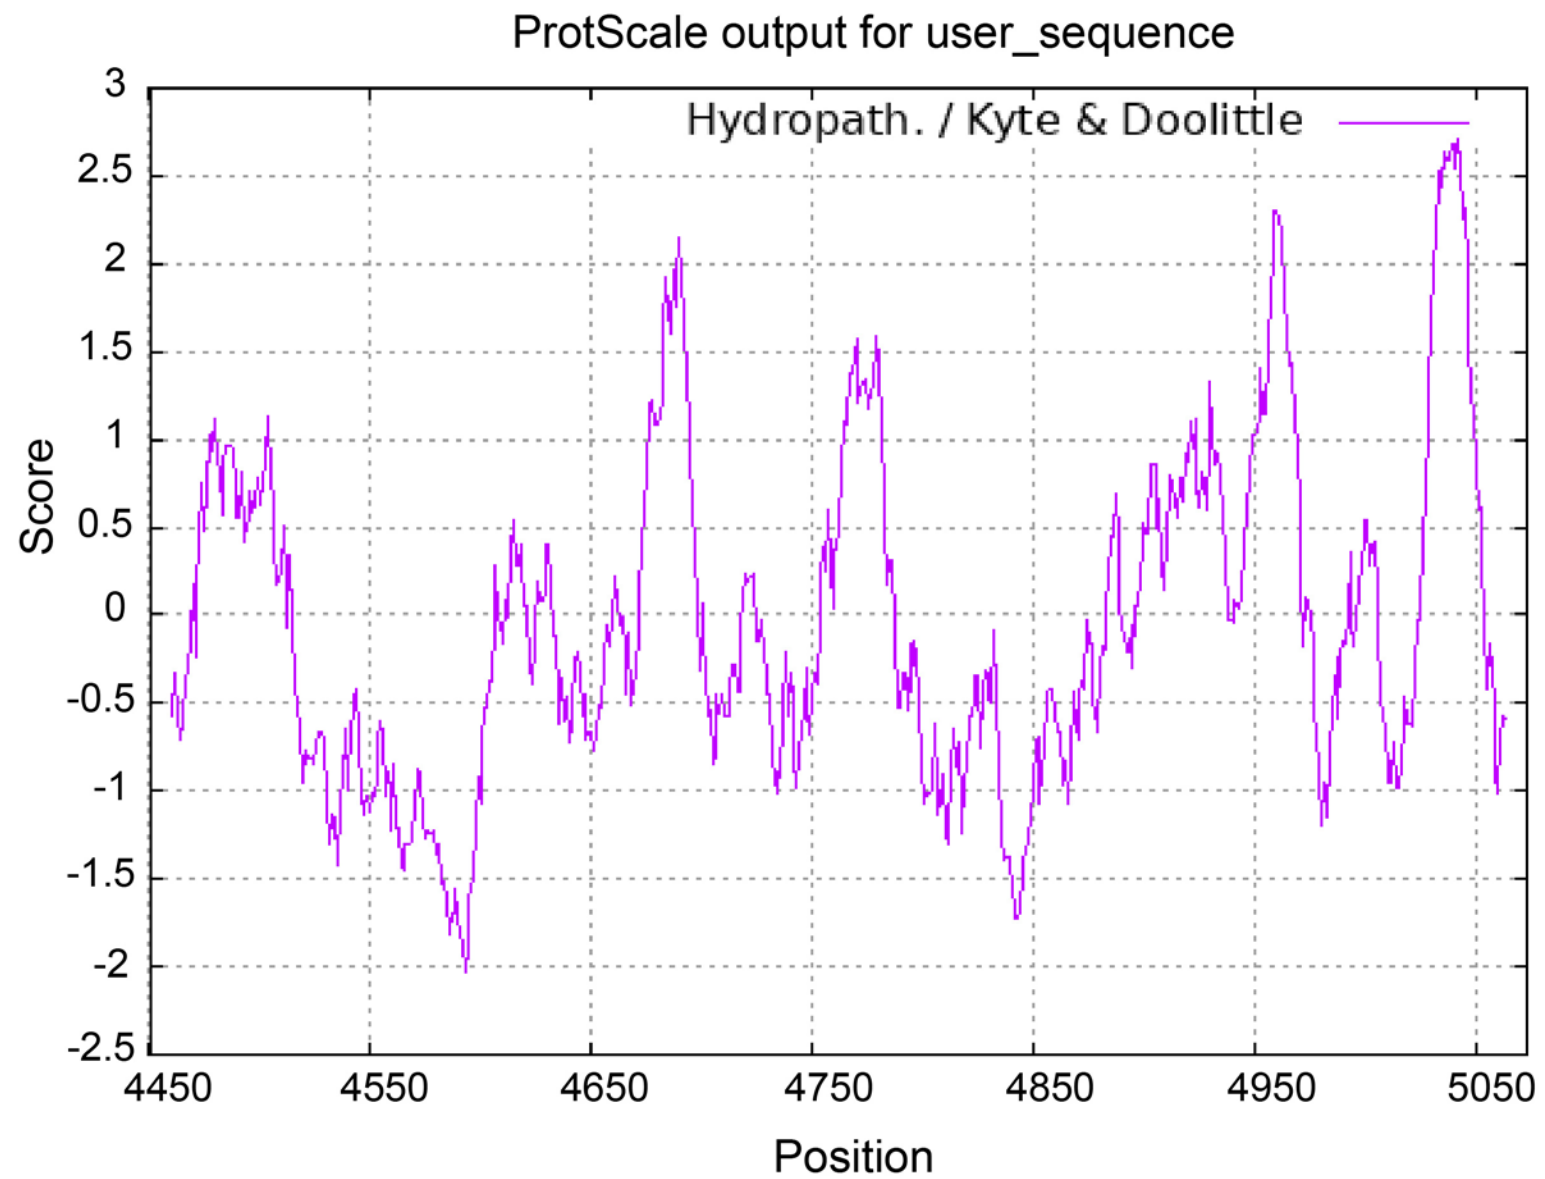

Supplement: s1 [file s1]
